# Supplementary material
Source: publisher figshare collection journal article supplement (https://acs.figshare.com/ndownloader/files/3741040)
Supplement: Supplementary file 1 [file 3741040]

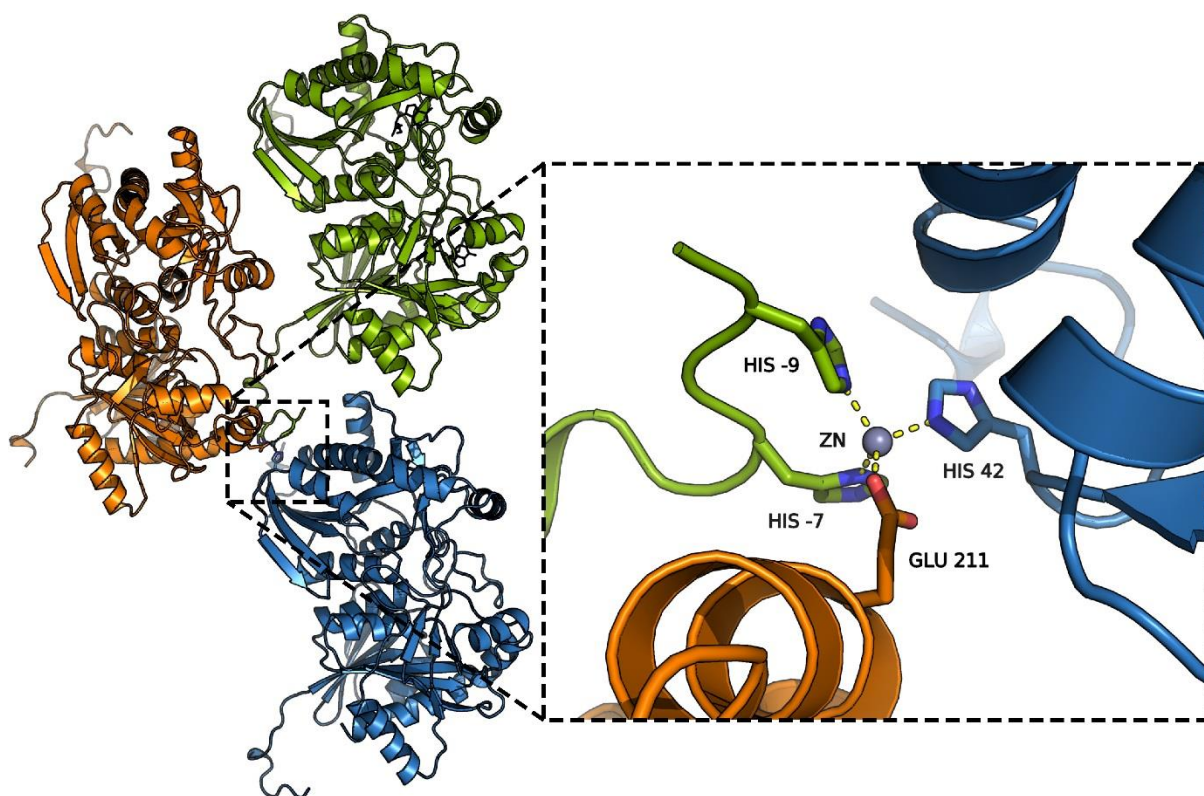

**Figure.** Three *Hp*MTAN dimers with **54** bound, illustrating the tetrahedral zinc coordination complex formed by fusion tag histidine residues (His -7 and His -9) and main chain residues (His 42 and Glu 211) from neighboring dimers.
